# Supplementary material
Source: PubMed Central journal article supplement (PMC2849187)
Supplement: supp_76_8_2439__2.pdf [file supp_76_8_2439__2.pdf]

## 1 **Supplementary materials**

2 Suppl. Fig. 1. A. Colonies of MSR-1\_SU4, left panel and, MSR-1\_SU12, right panel.

3 Before excision by *Cre* recombinase, colonies are blue, due to  $\beta$ -glucuronidase gene (*gusA*)

4 expression harbored on the inserted pKmob*GII* vector. After excision of the genomic

5 fragment colonies that lost the inserted vector appear whitish.

6 B. Amplification of the PCR product bridging the deletion region with flanking primer pairs

7 mamAB\_SUfw and mamAB\_SUrw (right lane). M: 1 kb-DNA ladder marker.

8 C. Southern blot analysis of HincII digested genomic DNA from parental strains and deletants

9 hybridized with  $\alpha$ -P<sup>32</sup>dATP labeled probe SondemamABfw + SondemamABrw is

10 homologous to 981 bp at positions *mgr4088* to *mgr4089* (Fig. 2). Lane 1: Two bands of 4.188

11 kb and 1.543 kb can be detected in the WT (MSR-1), whereas the control MSR-1B (lane 2)

12 lacking a 40 kb regions including the *mamAB* operon yields no signal. Lane 3:  $\Delta$ *mamAB*#K7

13 yields a single band at 1.543 kb plus homologous region as result of the insertion of pSU12,

14 indicating proper deletion.

15

16 Suppl. Table 1. Primers and probes used in this study

| Primer <sup>a</sup> | Nucleotide sequence                                  |
|---------------------|------------------------------------------------------|
| 5'mamABfw_SU        | GAATTCATGCCGGACCAGGCTCGTAA                           |
| 5'mamABrw_SUloxP    | ATAACTTCGTATAGCATAATTATACGAAGTTATCCCGTCACAATTCACCT   |
| 3'mamABfw_SUloxP    | ATAACTTCGTATAGCATAATTATACGAAGTTATTAACGCCGCCATGGCCATG |
| 3'mamABrw_SU        | GAATTCATCAGGGCCGATAAATGTT                            |
| mamAB_SUfw          | GAAAGAGAGCATGGCATCCTG                                |
| mamAB_SUrw          | TGACCGATCAGGCTGCCTGA                                 |
| SondemamABfw        | GGTGTCTAATTCCTCCAGACA                                |
| SondemamABrw        | GTCGTCCTGAAATCACCGG                                  |
| 5'MGR4058SUfw       | GGATCCAGAAGACCGAGAATAAGCGC                           |
| 5'MGR4058SUrw       | TCTAGACATTTCCGCCGGATCGCAAC                           |

|               |                                  |
|---------------|----------------------------------|
| SU127_f       | CAGTGCATTATCTGCCGGT              |
| SU132_r       | GCGAGCATCCTCAGTGCGTA             |
| 3'MGR4146SUfw | GTCGACTGATATCGCCACCTTATGGG       |
| 3'MGR4146SUrw | AAGCTTACCAGCGACCCGCGCTTGCAATTGGC |

---

17 <sup>a</sup> Sequence 5' to 3'.
