# Supplementary material
Source: PubMed Central journal article supplement (PMC2849187)

# Supplement Figure 1

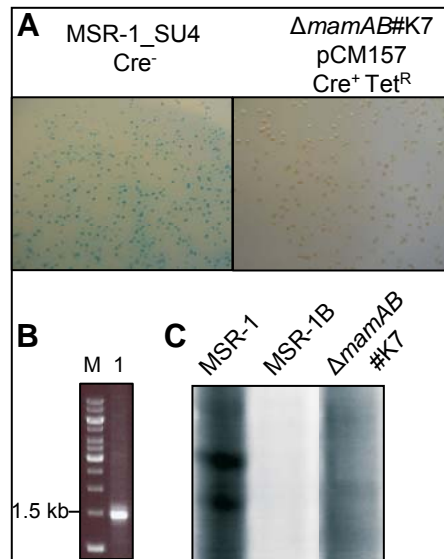

Supplement: supp_76_8_2439__1.pdf [file supp_76_8_2439__1.pdf]
